# Supplementary material
Source: Springer Nature journal article supplement (https://www.springermedizin.de/resource/supplementary/12960_2011_311_MOESM5_ESM.pdf/9569782)
Supplement: MOESM5 [file 9569782]

Note: Numbers on the Bars Indicate Density (Per 10,000 Population)

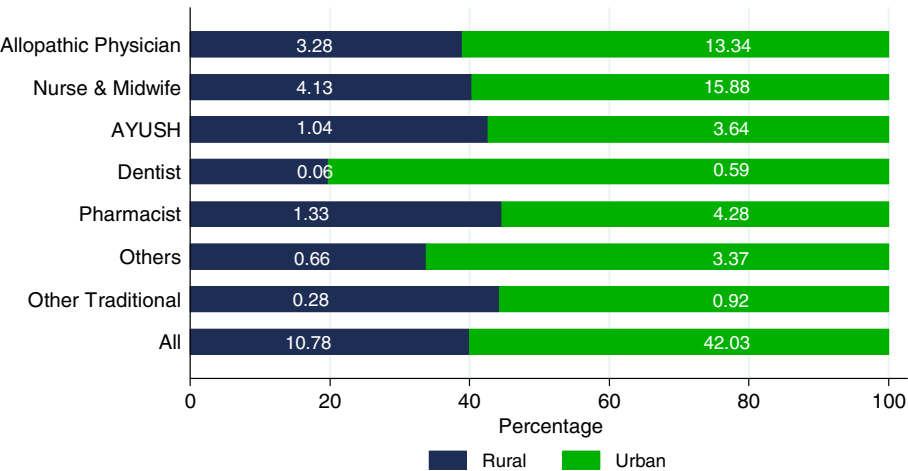

■ Rural ■ Urban

Source: Census of India 2001

AYUSH = Ayurvedic, Yoga, Unani; Others = Dietician & Nutritionist, Opticians, Dental Assistant, Physiotherapist, Medical Assistant & Technician and Other Hospital Staff; Other Traditional = Traditional Medicine Practitioner, Faith Healer
